# Supplementary material for: Conservation and Divergence of SQUAMOSA-PROMOTER BINDING PROTEIN-LIKE (SPL) Gene Family between Wheat and Rice
Source: MDPI journal article supplement (doi:10.3390/ijms23042099), 2022-02-14
Supplement: s1 [file s1]

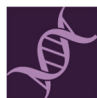

## Supplementary Information for

Article

# Conservation and Divergence of *SQUAMOSA-PROMOTER BINDING PROTEIN-LIKE (SPL)* Gene Family between Wheat and Rice

Li Li †, Fu Shi †, Guoli Wang, Yanbin Guan, Yufan Zhang, Mingjie Chen, Junli Chang, Guangxiao Yang, Guangyuan He, Yuesheng Wang \* and Yin Li \*

The Genetic Engineering International Cooperation Base of Chinese Ministry of Science and Technology, Key Laboratory of Molecular Biophysics of Chinese Ministry of Education, College of Life Science and Technology, Huazhong University of Science and Technology, Wuhan 430074, China; hustll2017@hust.edu.cn (L.L.); hustshifu@hust.edu.cn (F.S.); m202071947@hust.edu.cn (G.W.); gyb@hust.edu.cn (Y.G.); d201980545@hust.edu.cn (Y.Z.); cmj@hust.edu.cn (M.C.); cjl@hust.edu.cn (J.C.); ygx@hust.edu.cn (G.Y.); hegy@hust.edu.cn (G.H.)

\* Correspondence: wys@hust.edu.cn (Y.W.); yinli2021@hust.edu.cn (Y.L.)

† These authors contributed equally to this work.

**Citation:** Li, L.; Shi, F.; Wang, G.; Guan, Y.; Zhang, Y.; Chen, M.; Chang, J.; Yang, G.; He, G.; Wang, Y.; et al. Conservation and Divergence of *SQUAMOSA-PROMOTER BINDING PROTEIN-LIKE (SPL)* Gene Family between Wheat and Rice. *Int. J. Mol. Sci.* **2022**, *23*, 2099. <https://doi.org/10.3390/ijms23042099>

Academic Editor: Luigi Cattivelli

Received: 15 December 2021

Accepted: 30 January 2022

Published: 14 February 2022

**Publisher's Note:** MDPI stays neutral with regard to jurisdictional claims in published maps and institutional affiliations.

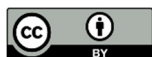

**Copyright:** © 2022 by the authors. Licensee MDPI, Basel, Switzerland. This article is an open access article distributed under the terms and conditions of the Creative Commons Attribution (CC BY) license (<https://creativecommons.org/licenses/by/4.0/>).

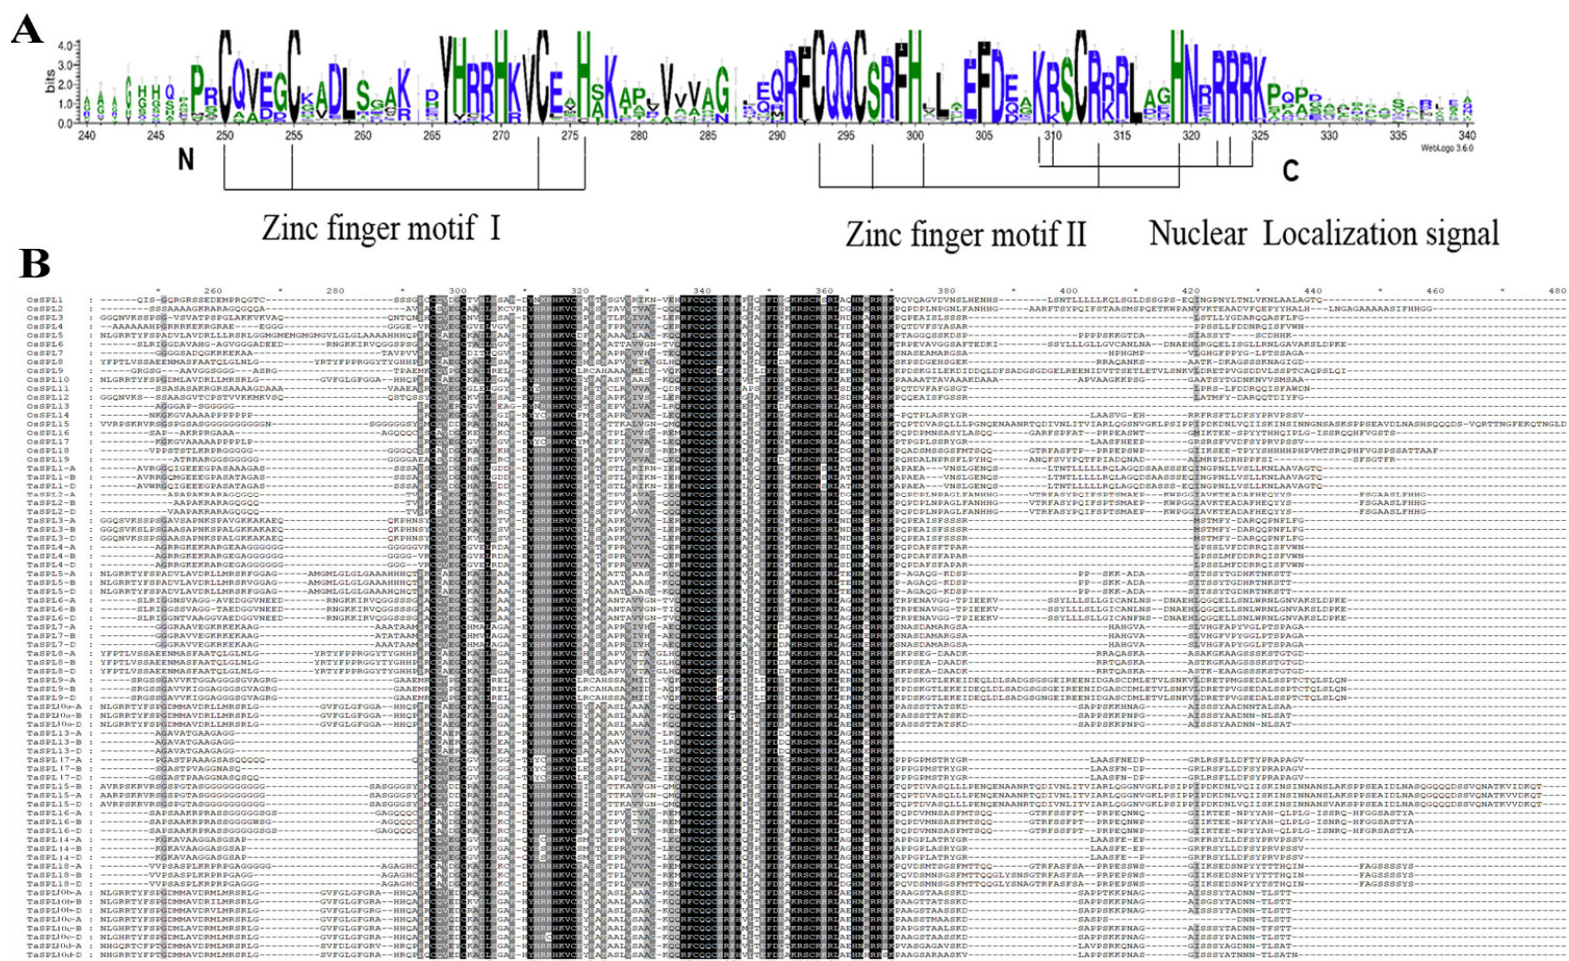

**Figure S1.** Multiple-sequence alignment of the TaSPL proteins. **(A)** Sequence logo analysis showing that the SBP domains among the TaSPL proteins share conserved zinc finger motifs I and II and nuclear localization signal. The overall height of each stacked amino acid residue represents the degree of conservation at this position, while the height of the letters within each stack indicates the relative frequency of the corresponding amino acid residues. **(B)** Multiple-sequence alignment of the 56 TaSPL and 19 OsSPL proteins, obtained using the ClustalW2.0 software.

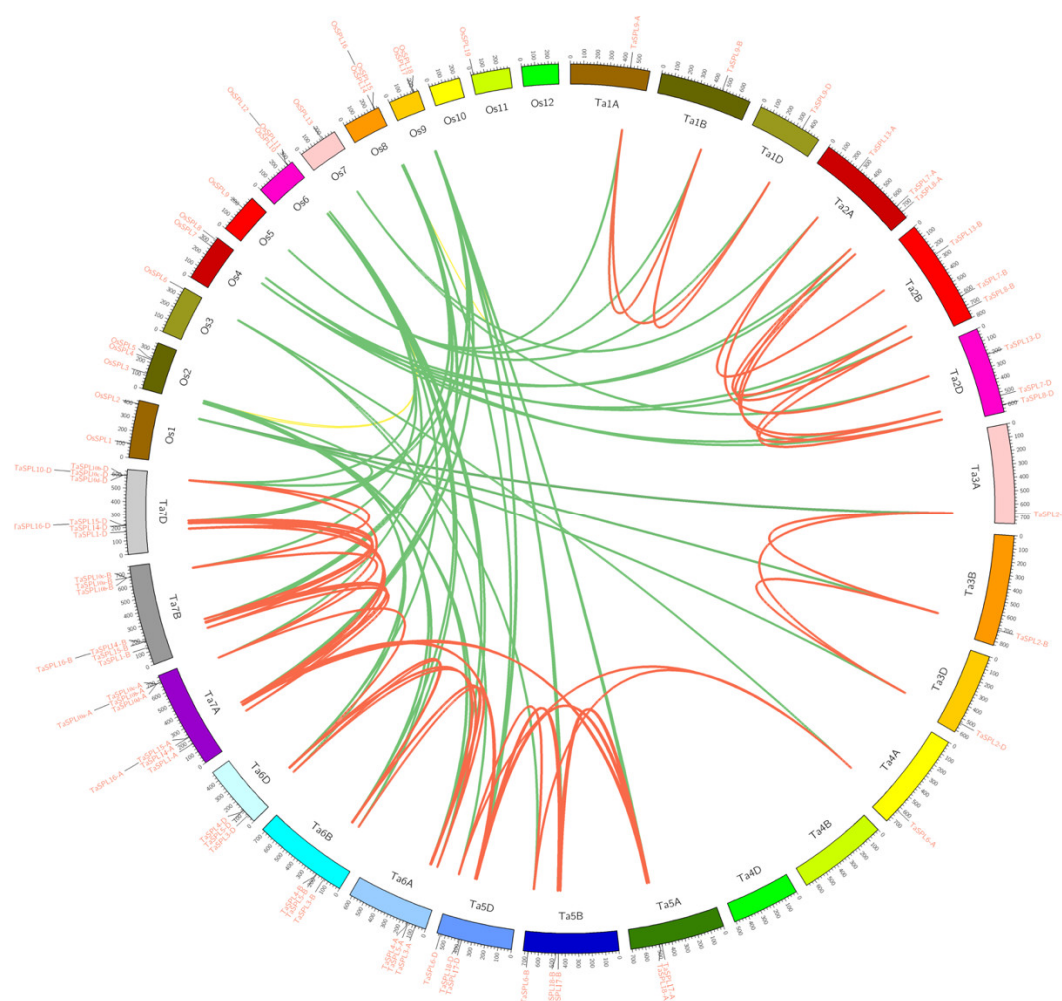

**Figure S2.** Syntenic analysis validating the orthologous relationship between *TaSPL* and *OsSPL* genes. The homeologous relationship within each triad confirmed by the syntenic analysis results is shown as red lines, while the orthologous relationships between *OsSPLs* and *TaSPLs* are shown as green lines, consistent with the phylogenetic results (**Figure 1A**).



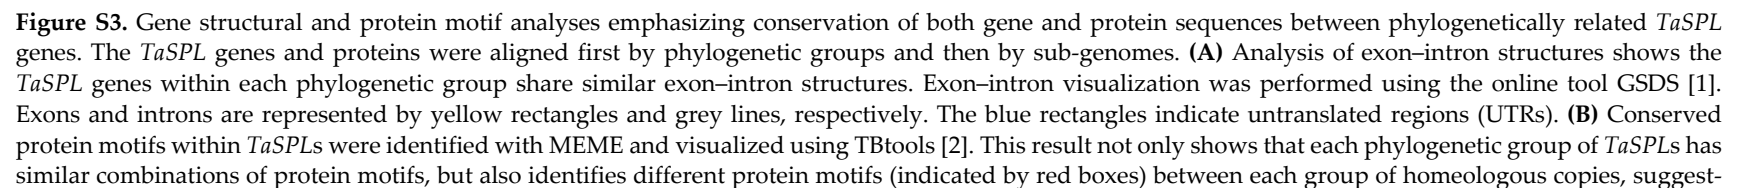

ing sequence divergence. (C) The amino acid sequences of MEME-predicted motifs in *TaSPLs*. The position and length of these motifs can be identified, according to the scale bar, and the different motifs are represented by different colors.

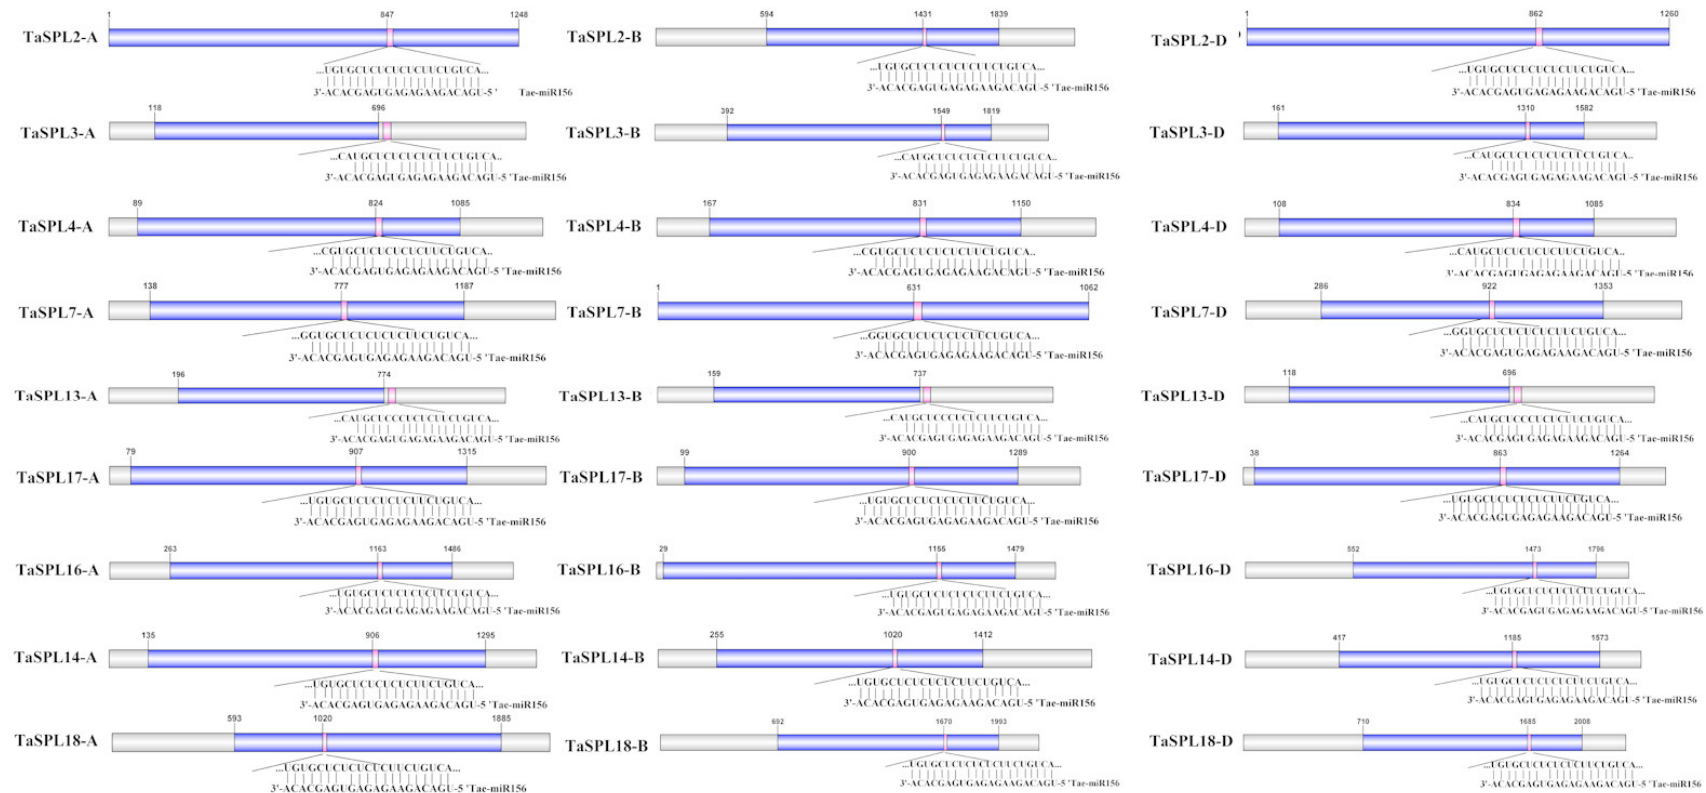

**Figure S4.** Possible miR156 cleavage sites in the *TaSPL* genes predicted by the psRNATarget server software [3]. The grey bars represent cDNA of the *TaSPL* genes, with the purple bars highlighting the open reading frames (ORFs). The red lines represent the predicted taе-miR156 cleavage sites, with the complementary cDNA and taе-miR156 sequences given in detail.

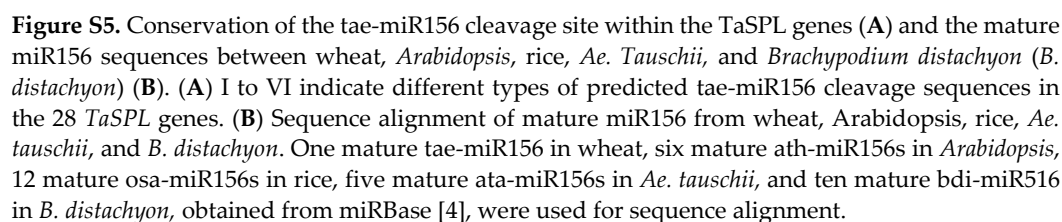

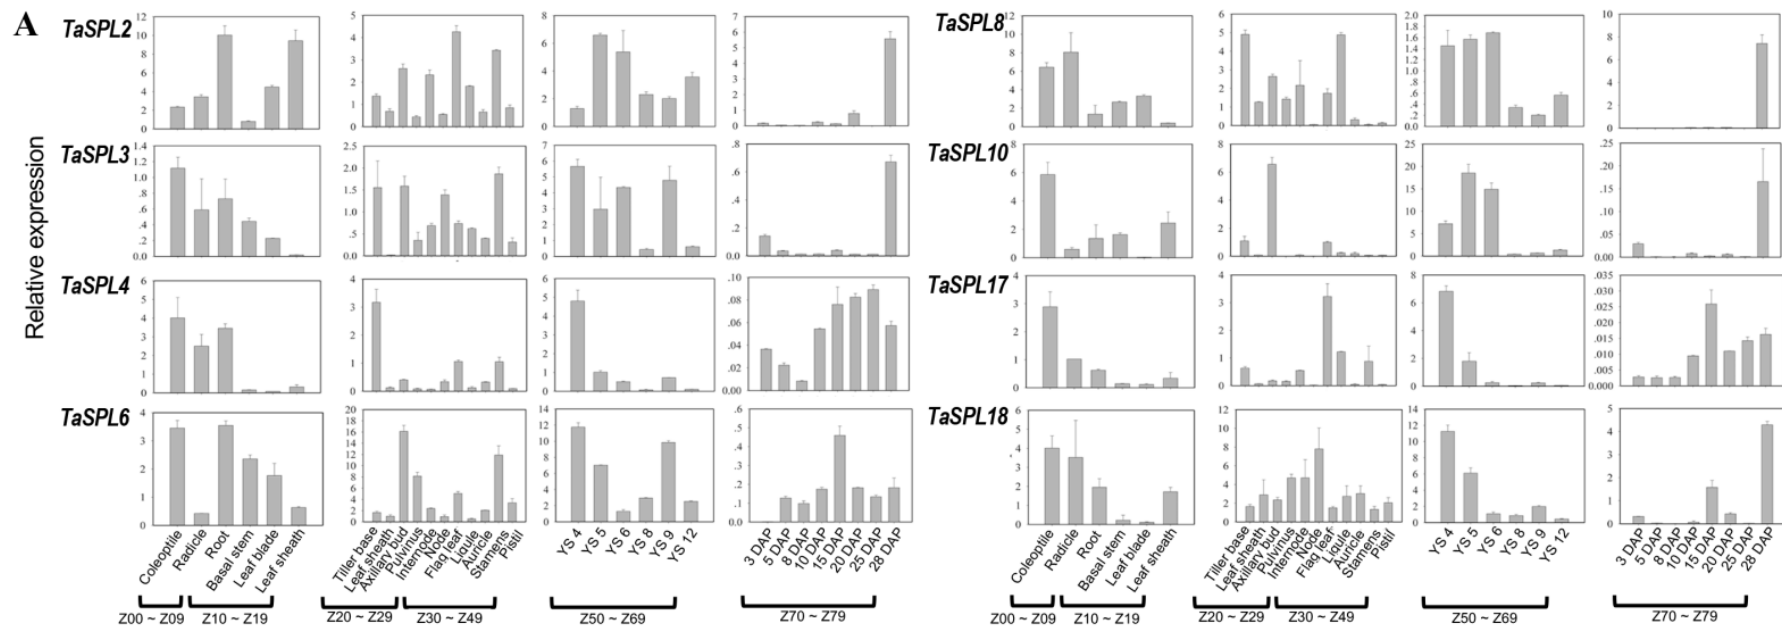

**Figure S6.** Quantitative PCR (qPCR) validation of spatial-temporal expression profiles of *TaSPL2/3/4/6/8/10/17/18* across developmental stages and tissues in wheat cv. China Spring. *TaActin* (TraesCS1B02G283900) was used as the reference gene. The various tissues and organs were collected following the scales of Zadoks and Tottman for cereal development processes [5, 6]. Z00–Z79 represent various vegetative and reproductive tissues at different developmental stages of wheat. Y-axis, relative expression levels; X-axis, different tissues; YS, young spikes; DAP, day after pollination.

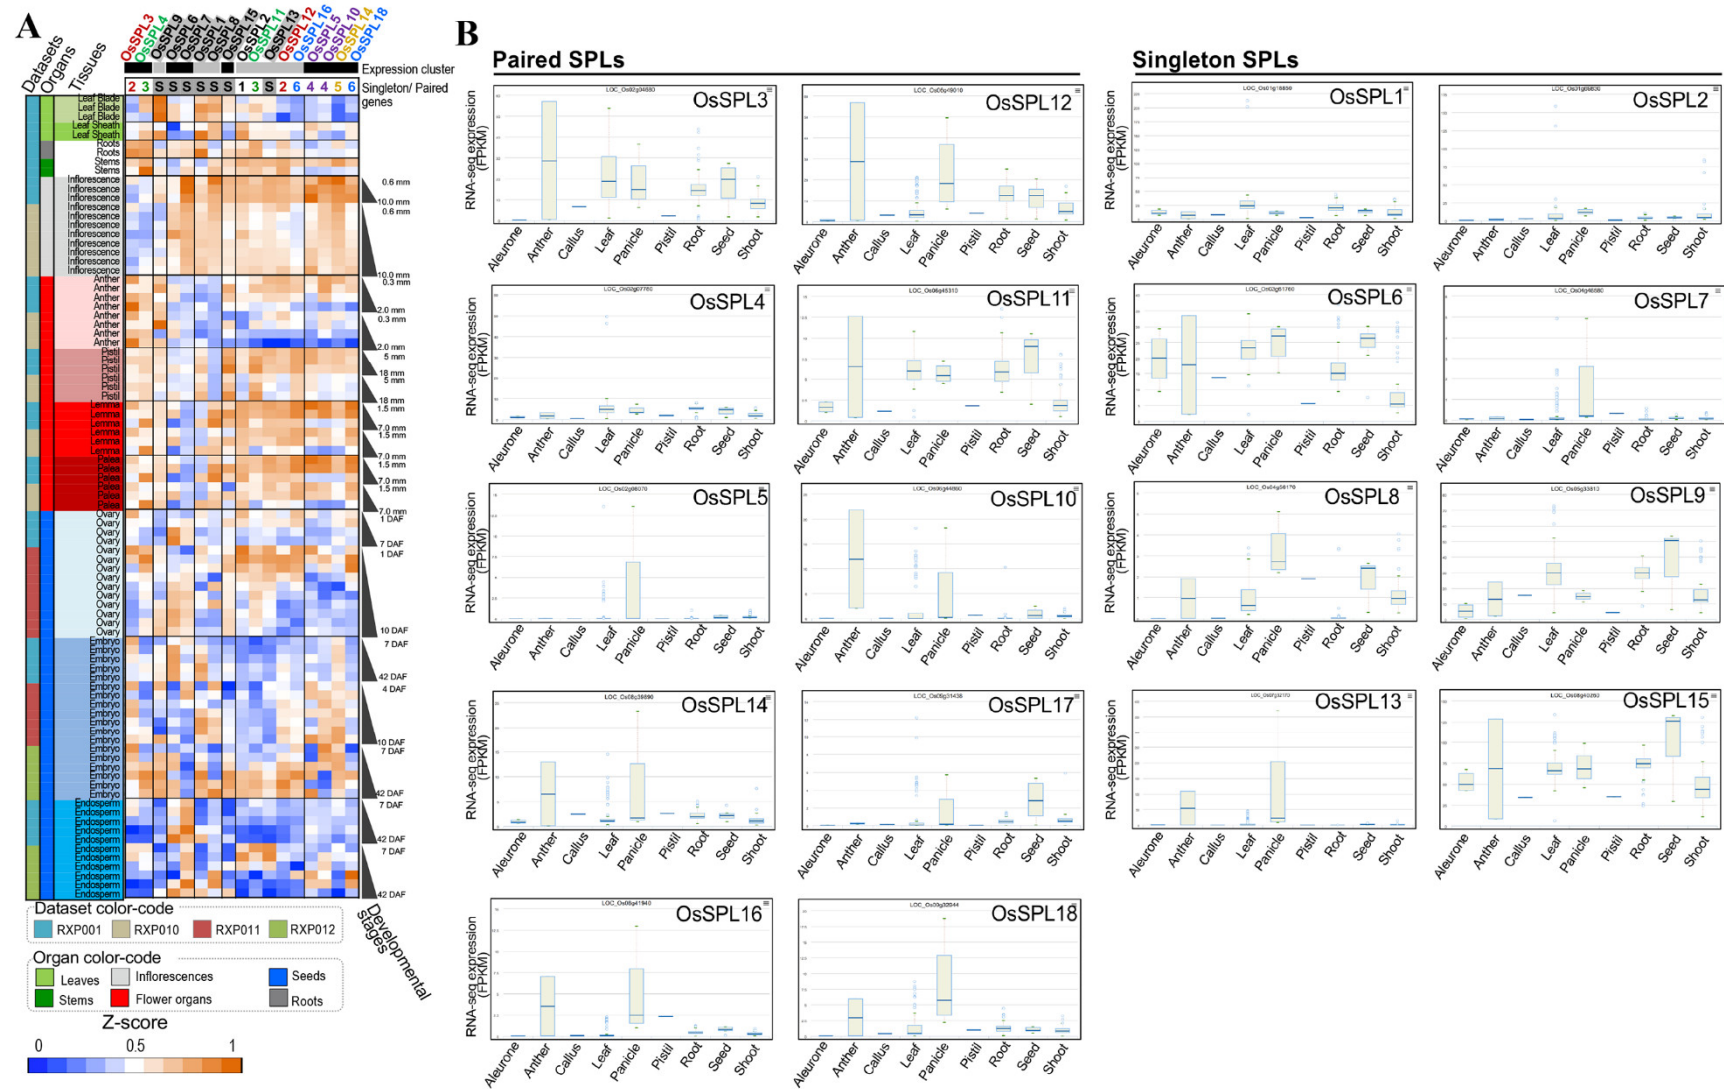

**Figure S7.** Expression profiles of *OsSPLs* based on microarray data (A) and RNA-seq data (B). (A) Microarray-based *OsSPL* expression profiles were retrieved from RiceXPro and visualized using heatmap. Each column represents an *OsSPL* gene, and each row represents a microarray sample, with the microarray data



sets, organs, and tissues labeled on the left, and the developmental stages labeled on the right of the heatmap. Information about microarray data sets and organs where the data were collected are color-coded. In Fig. S7A, singleton *OsSPLs* are shaded in grey, while evolutionarily paired *OsSPLs* are highlighted using colors, with red, green, gold, blue, and purple indicating Pair 1, Pair 2, Pair 3, Pair 4, and Pair 5, respectively. The *OsSPL* genes are row-clustered into seven clusters, based on expression similarity determined by k-means clustering. Abbreviations: DAF, days after flowering. **(B)** The RNA-seq-based expression abundance of each *OsSPL* gene was queried in the rice expression database (RED), and is shown in boxplots, in which gene expression values are normalized (in FPKM) between the RED data sets and grouped according to organs.

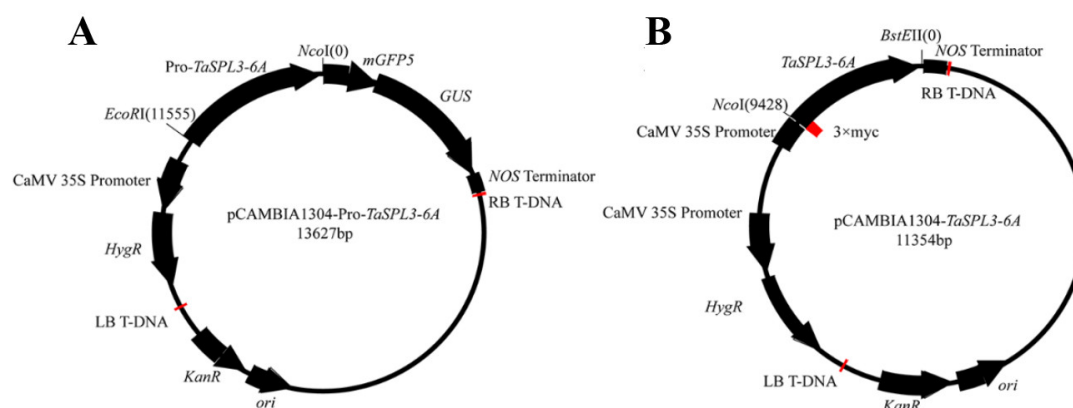

**Figure S8.** Diagrams of the promoter analysis vector (pCAMBIA1304-TaSPL3-6A-pro-GUS, **Fig. A**) and the overexpression vector (pCAMBIA1304-3 × myc-TaSPL3-6A, **Fig. B**). **(A)** In the pCAMBIA1304-TaSPL3-6A-pro-GUS vector, the TaSPL3-6A promoter (labeled as Pro-TSPL3-6A) drives the expression of a GFP-GUS fused gene (labeled as mGFP5 and GUS); **(B)** In the pCAMBIA1304-3 × myc-TaSPL3-6A vector, CaMV 35S promoter drives the expression of TaSPL3-6A, with its 5' end fused to a 3x myc tag for detection.

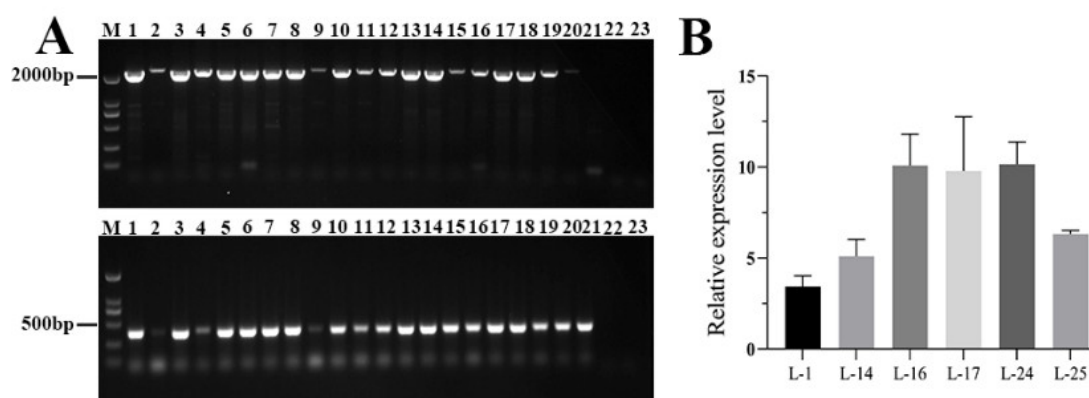

**Figure S9.** Molecular characterization of the TaSPL3-OE lines of rice. **(A)** PCR amplification of the *hygR* gene and the full sequence of the *TaSPL3-6A*. Lane M, DNA marker BM2000+. Lane 1, pCAMBIA1304-3 × myc-TaSPL3-6A for the positive control. Lanes 2–21, genomic DNA of the regenerated rice plants. Lane 22, genomic DNA of the negative control (rice cv. Nipponbare). Lane 23, negative PCR control using water as the template. The upper and lower panels were amplified by PCR using the full sequences of the *TaSPL3-6A* and *hygR* genes, respectively. **(B)** The transgenic lines were confirmed by a qRT-PCR method, where the primers were located in coding region of *TaSPL3-6A* gene with *OsActin* as the reference gene.

**Table S1.** Summary of the nomenclature for TaSPL genes from the present study and several previous studies [41–44 in the main text].

| Gene Name_present study | geneID             | proteinID            | Chr.  | No. of Exon | Protein length (aa) | Group* | Rice ortholog | Gene Name in Song et al. 2019 Agronomy | Gene Name in Zhu et al. 2020 BMC Plant Biol | Gene Name in Li et al. 2020 Sci Rep | Gene Name in Guo et al. 2020 Botany |
|-------------------------|--------------------|----------------------|-------|-------------|---------------------|--------|---------------|----------------------------------------|---------------------------------------------|-------------------------------------|-------------------------------------|
| TaSPL10a-A              | TraesCS7A02G495100 | TraesCS7A02G495100.1 | chr7A | 3           | 419                 | III    | OsSPL10       | TaSBP19-ALa                            | TaSPL041                                    | TaSBP19A                            | TaSPL19A                            |
| TaSPL10a-B              | TraesCS7B02G402200 | TraesCS7B02G402200.1 | chr7B | 3           | 417                 | III    | OsSPL10       | TaSBP19-BLa                            | TaSPL046                                    | TaSBP19D                            | TaSPL19B                            |
| TaSPL10a-D              | TraesCS7D02G482500 | TraesCS7D02G482500.1 | chr7D | 3           | 317                 | III    | OsSPL10       | TaSBP19-DLa                            | TaSPL056                                    | na.                                 | TaSPL19D                            |
| TaSPL13-A               | TraesCS2A02G232400 | TraesCS2A02G232400.1 | chr2A | 2           | 192                 | IV     | OsSPL13       | TaSBP2-ASa                             | TaSPL004                                    | TaSBP2A                             | TaSPL2A                             |
| TaSPL13-B               | TraesCS2B02G250900 | TraesCS2B02G250900.1 | chr2B | 2           | 192                 | IV     | OsSPL13       | TaSBP2-BSa                             | TaSPL007                                    | TaSBP2B                             | TaSPL2B                             |
| TaSPL13-D               | TraesCS2D02G232800 | TraesCS2D02G232800.1 | chr2D | 2           | 192                 | IV     | OsSPL13       | TaSBP2-DSa                             | TaSPL010                                    | TaSBP2D                             | TaSPL2D                             |
| TaSPL17-A               | TraesCS5A02G265900 | TraesCS5A02G265900.1 | chr5A | 3           | 410                 | V      | OsSPL17       | TaSBP7-ALa                             | TaSPL017                                    | na.                                 | TaSPL7A                             |
| TaSPL17-B               | TraesCS5B02G265600 | TraesCS5B02G265600.1 | chr5B | 3           | 395                 | V      | OsSPL17       | TaSBP7-BLa                             | TaSPL019                                    | TaSBP8B                             | TaSPL7B                             |
| TaSPL17-D               | TraesCS5D02G273900 | TraesCS5D02G273900.1 | chr5D | 3           | 407                 | V      | OsSPL17       | TaSBP7-DLa                             | TaSPL022                                    | na.                                 | TaSPL7D                             |
| TaSPL15-A               | TraesCS7A02G249100 | TraesCS7A02G249100.2 | chr7A | 9           | 898                 | II     | OsSPL15       | TaSBP14-ASa                            | TaSPL036                                    | na.                                 | TaSPL14A                            |
| TaSPL15-B               | TraesCS7B02G142200 | TraesCS7B02G142200.1 | chr7B | 10          | 1129                | II     | OsSPL15       | TaSBP14-BSa                            | TaSPL043                                    | TaSBP16B                            | TaSPL14B                            |
| TaSPL15-D               | TraesCS7D02G248000 | TraesCS7D02G248000.1 | chr7D | 10          | 1129                | II     | OsSPL15       | TaSBP14-DSa                            | TaSPL051                                    | TaSBP16D                            | TaSPL14D                            |
| TaSPL16-A               | TraesCS7A02G260500 | TraesCS7A02G260500.1 | chr7A | 3           | 407                 | I      | OsSPL16       | TaSBP15-ASa                            | TaSPL037                                    | TaSBP15A                            | TaSPL15A                            |
| TaSPL16-B               | TraesCS7B02G158500 | TraesCS7B02G158500.1 | chr7B | 3           | 409                 | I      | OsSPL16       | TaSBP15-BSa                            | TaSPL045                                    | TaSBP15B                            | TaSPL15B                            |
| TaSPL16-D               | TraesCS7D02G261500 | TraesCS7D02G261500.1 | chr7D | 3           | 414                 | I      | OsSPL16       | TaSBP15-DSa                            | TaSPL052                                    | TaSBP15D                            | TaSPL15D                            |
| TaSPL14-A               | TraesCS7A02G246500 | TraesCS7A02G246500.1 | chr7A | 3           | 386                 | V      | OsSPL14       | TaSBP13-ASa                            | TaSPL035                                    | TaSBP17A                            | TaSPL13A                            |
| TaSPL14-B               | TraesCS7B02G144900 | TraesCS7B02G144900.1 | chr7B | 3           | 386                 | V      | OsSPL14       | TaSBP13-BSa                            | TaSPL044                                    | TaSBP17B                            | TaSPL13B                            |
| TaSPL14-D               | TraesCS7D02G245200 | TraesCS7D02G245200.1 | chr7D | 3           | 384                 | V      | OsSPL14       | TaSBP13-DSa                            | TaSPL050                                    | TaSBP17D                            | TaSPL13D                            |
| TaSPL18-A               | TraesCS5A02G286700 | TraesCS5A02G286700.1 | chr5A | 3           | 430                 | I      | OsSPL18       | TaSBP8-ALa                             | TaSPL018                                    | TaSBP7A                             | TaSPL8A                             |
| TaSPL18-B               | TraesCS5B02G286000 | TraesCS5B02G286000.1 | chr5B | 3           | 433                 | I      | OsSPL18       | TaSBP8-BLa                             | TaSPL020                                    | TaSBP7B                             | TaSPL8B                             |
| TaSPL18-D               | TraesCS5D02G294400 | TraesCS5D02G294400.1 | chr5D | 3           | 432                 | I      | OsSPL18       | TaSBP8-DLa                             | TaSPL023                                    | TaSBP7D                             | TaSPL8D                             |
| TaSPL1-A                | TraesCS7A02G208000 | TraesCS7A02G208000.1 | chr7A | 11          | 846                 | II     | OsSPL1        | TaSBP12-ASa                            | TaSPL034                                    | na.                                 | TaSPL12A                            |
| TaSPL1-B                | TraesCS7B02G115200 | TraesCS7B02G115200.1 | chr7B | 11          | 845                 | II     | OsSPL1        | TaSBP12-BSa                            | TaSPL042                                    | TaSBP18B                            | TaSPL12B                            |
| TaSPL1-D                | TraesCS7D02G210400 | TraesCS7D02G210400.1 | chr7D | 11          | 822                 | II     | OsSPL1        | TaSBP12-DSa                            | TaSPL049                                    | TaSBP18D                            | TaSPL12D                            |
| TaSPL10b-A              | TraesCS7A02G495000 | TraesCS7A02G495000.1 | chr7A | 3           | 388                 | III    | OsSPL10       | TaSBP18-ALa                            | TaSPL040                                    | TaSBP13A                            | TaSPL18A                            |
| TaSPL10b-B              | TraesCS7B02G402300 | TraesCS7B02G402300.1 | chr7A | 3           | 406                 | III    | OsSPL10       | TaSBP20-ALa                            | TaSPL047                                    | TaSBP13B                            | TaSPL18B                            |
| TaSPL10b-D              | TraesCS7D02G482400 | TraesCS7D02G482400.1 | chr7D | 3           | 394                 | III    | OsSPL10       | TaSBP24-DLa                            | TaSPL055                                    | TaSBP13D                            | TaSPL18D                            |
| TaSPL10c-A              | TraesCS7A02G494900 | TraesCS7A02G494900.1 | chr7A | 3           | 394                 | III    | OsSPL10       | TaSBP17-ALa                            | TaSPL039                                    | TaSBP14A                            | TaSPL17A                            |

|            |                    |                      |       |    |     |     |         |             |          |          |          |
|------------|--------------------|----------------------|-------|----|-----|-----|---------|-------------|----------|----------|----------|
| TaSPL10c-B | TraesCS7B02G402400 | TraesCS7B02G402400.1 | chr7B | 3  | 401 | III | OsSPL10 | TaSBP21-BLa | TaSPL048 | TaSBP14B | TaSPL17B |
| TaSPL10c-D | TraesCS7D02G482300 | TraesCS7D02G482300.1 | chr7D | 3  | 390 | III | OsSPL10 | TaSBP23-DLa | TaSPL054 | TaSBP14D | TaSPL17D |
| TaSPL10d-A | TraesCS7A02G494800 | TraesCS7A02G494800.1 | chr7A | 3  | 399 | III | OsSPL10 | TaSBP16-ALa | TaSPL038 | TaSBP12A | TaSPL16A |
| TaSPL10d-D | TraesCS7D02G482200 | TraesCS7D02G482200.1 | chr7D | 3  | 408 | III | OsSPL10 | TaSBP22-DLa | TaSPL053 | TaSBP12D | TaSPL16D |
| TaSPL2-A   | TraesCS3A02G432500 | TraesCS3A02G432500.1 | chr3A | 3  | 415 | I   | OsSPL2  | TaSBP5-ALa  | TaSPL013 | TaSBP5A  | TaSPL5A  |
| TaSPL2-B   | TraesCS3B02G468400 | TraesCS3B02G468400.1 | chr3B | 3  | 414 | I   | OsSPL2  | TaSBP5-BLa  | TaSPL014 | TaSBP5B  | TaSPL5B  |
| TaSPL2-D   | TraesCS3D02G425800 | TraesCS3D02G425800.1 | chr3D | 3  | 419 | I   | OsSPL2  | TaSBP5-DLa  | TaSPL015 | TaSBP5D  | TaSPL5D  |
| TaSPL3-A   | TraesCS6A02G110100 | TraesCS6A02G110100.1 | chr6A | 3  | 377 | V   | OsSPL3  | TaSBP9-ASa  | TaSPL025 | TaSBP9A  | TaSPL9A  |
| TaSPL3-B   | TraesCS6B02G138400 | TraesCS6B02G138400.1 | chr6B | 4  | 473 | V   | OsSPL3  | TaSBP9-BSa  | TaSPL028 | TaSBP9B  | TaSPL9B  |
| TaSPL3-D   | TraesCS6D02G098500 | TraesCS6D02G098500.1 | chr6D | 4  | 473 | V   | OsSPL3  | TaSBP9-DSa  | TaSPL031 | TaSBP9D  | TaSPL9D  |
| TaSPL4-A   | TraesCS6A02G155300 | TraesCS6A02G155300.1 | chr6A | 4  | 328 | V   | OsSPL4  | TaSBP11-ASa | TaSPL027 | TaSBP10A | TaSPL11A |
| TaSPL4-B   | TraesCS6B02G183400 | TraesCS6B02G183400.1 | chr6B | 4  | 327 | V   | OsSPL4  | TaSBP11-BSa | TaSPL030 | TaSBP10B | TaSPL11B |
| TaSPL4-D   | TraesCS6D02G145200 | TraesCS6D02G145200.1 | chr6D | 4  | 325 | V   | OsSPL4  | TaSBP11-DSa | TaSPL033 | TaSBP10D | TaSPL11D |
| TaSPL5-A   | TraesCS6A02G152000 | TraesCS6A02G152000.1 | chr6A | 3  | 448 | III | OsSPL5  | TaSBP10-ASa | TaSPL026 | TaSBP11A | TaSPL10A |
| TaSPL5-B   | TraesCS6B02G180300 | TraesCS6B02G180300.1 | chr6B | 3  | 442 | III | OsSPL5  | TaSBP10-BSa | TaSPL029 | TaSBP11B | TaSPL10B |
| TaSPL5-D   | TraesCS6D02G142100 | TraesCS6D02G142100.1 | chr6D | 3  | 452 | III | OsSPL5  | TaSBP10-DSa | TaSPL032 | TaSBP11D | TaSPL10D |
| TaSPL6-A   | TraesCS4A02G359500 | TraesCS4A02G359500.1 | chr4A | 11 | 960 | II  | OsSPL6  | TaSBP6-ALa  | TaSPL016 | TaSBP6A  | TaSPL6A  |
| TaSPL6-B   | TraesCS5B02G512800 | TraesCS5B02G512800.1 | chr5B | 11 | 966 | II  | OsSPL6  | TaSBP6-BLa  | TaSPL021 | na.#     | TaSPL6B  |
| TaSPL6-D   | TraesCS5D02G513300 | TraesCS5D02G513300.1 | chr5D | 12 | 962 | II  | OsSPL6  | TaSBP6-DLa  | TaSPL024 | na.      | TaSPL6D  |
| TaSPL7-A   | TraesCS2A02G413900 | TraesCS2A02G413900.1 | chr2A | 3  | 349 | IV  | OsSPL7  | TaSBP3-ALa  | TaSPL005 | TaSBP3A  | TaSPL3A  |
| TaSPL7-B   | TraesCS2B02G432700 | TraesCS2B02G432700.1 | chr2B | 3  | 353 | IV  | OsSPL7  | TaSBP3-BLa  | TaSPL008 | na.      | TaSPL3B  |
| TaSPL7-D   | TraesCS2D02G410700 | TraesCS2D02G410700.1 | chr2D | 3  | 355 | IV  | OsSPL7  | TaSBP3-DLa  | TaSPL011 | TaSBP3D  | TaSPL3D  |
| TaSPL8-A   | TraesCS2A02G502300 | TraesCS2A02G502300.1 | chr2A | 3  | 412 | III | OsSPL8  | TaSBP4-ALa  | TaSPL006 | TaSBP4A  | TaSPL4A  |
| TaSPL8-B   | TraesCS2B02G530400 | TraesCS2B02G530400.1 | chr2B | 3  | 408 | III | OsSPL8  | TaSBP4-BLa  | TaSPL009 | TaSBP4B  | TaSPL4B  |
| TaSPL8-D   | TraesCS2D02G502900 | TraesCS2D02G502900.1 | chr2D | 3  | 406 | III | OsSPL8  | TaSBP4-DLa  | TaSPL012 | TaSBP4D  | TaSPL4D  |
| TaSPL9-A   | TraesCS1A02G255300 | TraesCS1A02G255300.1 | chr1A | 10 | 859 | II  | OsSPL9  | TaSBP1-ALa  | TaSPL001 | TaSBP1A  | TaSPL1A  |
| TaSPL9-B   | TraesCS1B02G266100 | TraesCS1B02G266100.1 | chr1B | 10 | 852 | II  | OsSPL9  | TaSBP1-BLa  | TaSPL002 | TaSBP1B  | TaSPL1B  |
| TaSPL9-D   | TraesCS1D02G254700 | TraesCS1D02G254700.1 | chr1D | 10 | 859 | II  | OsSPL9  | TaSBP1-DLa  | TaSPL003 | TaSBP1D  | TaSPL1D  |

Note: \* indicates the phylogenetic group reported in the present study; # “na.”, not applicable.



**Table S2.** The sequences and purposes of the primers used in this study.

| Primer name          | Primer sequence (5' to 3')                        | Primer purpose           | Plasmid                     |
|----------------------|---------------------------------------------------|--------------------------|-----------------------------|
| TaActin-F            | AAAATATGGCATCACACGTTT                             | qRT-PCR                  | /                           |
| TaActin-R            | ACACGAGCTACATCATCTAAGG                            | qRT-PCR                  | /                           |
| qTaSPL2F             | ATGTTGCACGCGTCTAACAG                              | qRT-PCR                  | /                           |
| qTaSPL2R             | AGTATCCATGGTACTGCTGCTG                            | qRT-PCR                  | /                           |
| qTaSPL3F             | CATCATGGTTTTCGATGGGTTC                            | qRT-PCR                  | /                           |
| qTaSPL3R             | CAAGGCTCCCGTCGTCATT                               | qRT-PCR                  | /                           |
| qTaSPL4F             | CAAGGCTCCCGTCGTCATT                               | qRT-PCR                  | /                           |
| qTaSPL4R             | CATTGGTAGCAGCTCAGGTATGTC                          | qRT-PCR                  | /                           |
| qTaSPL6F             | GGACAGACCACTGGCACCTAAT                            | qRT-PCR                  | /                           |
| qTaSPL6R             | TGACTAAGTTGAAGCCTTCTACCCT                         | qRT-PCR                  | /                           |
| qTaSPL8F             | TCAACATGGCTTCCCTTTCC                              | qRT-PCR                  | /                           |
| qTaSPL8R             | AAGCCTGGCTGTTCTTGTTG                              | qRT-PCR                  | /                           |
| qTaSPL10F            | TCTCCGACCAGAACAACAACAG                            | qRT-PCR                  | /                           |
| qTaSPL10R            | ATCGGTCTGCTACATGAAGTCCAC                          | qRT-PCR                  | /                           |
| qTaSPL14F            | GCAGCACCACCACCATCACA                              | qRT-PCR                  | /                           |
| qTaSPL14R            | AACTCAGGCCGCCCAACGT                               | qRT-PCR                  | /                           |
| qTaSPL18F            | TTCATGCTGTCAACCTGTGG                              | qRT-PCR                  | /                           |
| qTaSPL18R            | TCACCGCGCAATGATTCTTG                              | qRT-PCR                  | /                           |
| qTaSPL3-6A-F         | CATCATGGTTTTCGATGGGTTC                            | qRT-PCR                  | /                           |
| qTaSPL3-6A-R         | GGGGACTTGGCTGGAGGTT                               | qRT-PCR                  | /                           |
| T-TaSPL3-6A-F        | CTCTGCATACCCTCTGTTGCG                             | Gene amplification       | pMD-18-T-TaSPL3-6A          |
| T-TaSPL3-6A-R        | TTTTCCATGGCAACACGACT                              | Gene amplification       |                             |
| 1304-myc-TaSPL3-6A-F | ggggactcttgacc ATGGAACAAAAGTTGATCTCT              | Plasmid construct        | pCAMBIA1304-3×myc-TaSPL3-6A |
| 1304-myc-TaSPL3-6A-R | aaattcgagctgggtcac TCAGTGCATCCGGTCTGAAGTG         | Plasmid construct        |                             |
| BD-TaSPL3-6A-N-F     | ATATGGCCATGGAGGCCGAATTCATGGGCTCTTTTGGGATGGAG      | Activation activity test | pGBKT7-TaSPL3-6A-N          |
| BD-TaSPL3-6A-N-F     | GGCCGCTGCAGGTCGACGGATCCTCAGTATGAGTTATGTGGCTTCTG   | Activation activity test |                             |
| BD-TaSPL3-6A-SBP-F   | ATATGGCCATGGAGGCCGAATTCCTGTCAGGTTGAAGGCTGCAAAG    | Activation activity test | pGBKT7-TaSPL3-6A-SBP        |
| BD-TaSPL3-6A-SBP-R   | GGCCGCTGCAGGTCGACGGATCCTCATGGCTTGCCTGCGGGAATTATG  | Activation activity test |                             |
| BD-TaSPL3-6A-C-F     | ATATGGCCATGGAGGCCGAATTCAGCCAGAAGCAATTTCTTTTCAGTTC | Activation activity test | pGBKT7-TaSPL3-6A-C          |
| BD-TaSPL3-6A-C-R     | GGCCGCTGCAGGTCGACGGATCCTCAGTGCATCCGGTCTGAAGTG     | Activation activity test |                             |
| BD-TaSPL3-6A-FL-F    | ATATGGCCATGGAGGCCGAATTCATGGGCTCTTTTGGGATGGAGTG    | Activation activity test | pGBKT7-TaSPL3-6A-FL         |

|                       |                                             |                           |                               |
|-----------------------|---------------------------------------------|---------------------------|-------------------------------|
| BD-TaSPL3-6A-FL-R     | GGCCGCTGCAGGTCGACGGATCCTCAGTGCATCCGGTCGAAGT | Activation activity test  |                               |
| pSGN-TaSPL3-6A-F      | ttcatttgagagaacatctagaATGGGCTCTTTTG         | Sub-cellular Localization | pSGN-TaSPL3-6A-GFP            |
| pSGN-TaSPL3-6A-R      | gtcgacagtactatcgatggatccGTGCATCCGGTC        | Sub-cellular Localization |                               |
| 1304-Test-F           | GTACACAAATCGCCCGCAGA                        | Detection overexpression  | /                             |
| 1304-Test-R           | CTTAATAACACATTGCGGACGTT                     | Detection overexpression  | /                             |
| OsALL-F               | CCGACAGTGGTCCCAAAGAT                        | Detection overexpression  | /                             |
| OsALL-R               | GCGCGCTATATTTTGTCTTCTATCG                   | Detection overexpression  | /                             |
| qTaSPL3-6A-F          | GAAGAGGACCTTGAGCAGAAATTG                    | Detection overexpression  | /                             |
| qTaSPL3-6A-R          | CTGGTTCCACTCCATCCCAA                        | Detection overexpression  | /                             |
| OsTubulin-F           | TACCGTGCCCTTACTGTTCC                        | Detection overexpression  | /                             |
| OsTubulin-R           | CGGTGGAATGTCACAGACAC                        | Detection overexpression  | /                             |
| Pro-TaSPL3-6AF        | CAAGTCCCCATCCTTGCAAATTAGGGAAGCC             | Promoter amplification    |                               |
| Pro-TaSPL3-6AR        | GCCAGAGCCGAAGATCTCCGGCGCTCC                 | Promoter amplification    |                               |
| 1304-TaSPL3-6A-GUS-F  | GCTATGACCATGATTACGAATCCGATGTTTCGTGAC        | Plasmid construct         | pCAMBIA1304-TaSPL3-6A-pro-GUS |
| 1304-TaSPL3-6A-GUS-R  | CTTTACTAGTCAGATCTACCATGGGCCAGAGCCGAAGAT     | Plasmid construct         |                               |
| Check-Pro-TaSPL3-6A-F | AACTTGATCTTTGGTCCCTC                        | Detection overexpression  |                               |
| Check-Pro-TaSPL3-6A-R | GTTTTCGTCGGTAATCACCA                        | Detection overexpression  |                               |

**Table S3.** Summary of the expression patterns of *TaSPLs* in response to abiotic stress or phytohormone treatments. The references, methods for determining expression levels (qPCR or RNA-seq), cultivars analyzed, and treatment information are provided (as an EXCEL file).

**Table S4.** Analysis of yield parameters among transgenic TaSPL3-OE lines and control lines (wild-type Nipponbare and transgenic rice expressing the empty vector, VC) in rice.

| Agronomic traits                          | WT             | VC            | L-1           | L-14          | L-16          | L-17          | L-24          | L-25          |
|-------------------------------------------|----------------|---------------|---------------|---------------|---------------|---------------|---------------|---------------|
| Plant height (cm)                         | 106.53±0.74 a* | 105.96±2.97 a | 88.90±2.20 c  | 93.46±1.04 bc | 94.00±0.75 bc | 81.06±1.10 d  | 93.80±3.65 bc | 95.00±0.47 b  |
| Length of spikes (cm)                     | 25.50±0.50 a   | 25.33±0.25 a  | 22.78±0.42 b  | 22.42±0.49 b  | 22.62±0.40 b  | 22.51±0.74 b  | 22.75±0.51 b  | 22.52±0.21 b  |
| Number of primary branches                | 11.11±0.42 a   | 10.83±0.30 a  | 9.57±0.42 b   | 10.66±0.40 ab | 10.77±0.32 ab | 9.40±0.67 b   | 10.55±0.47 ab | 10.88±0.51 ab |
| Length of primary branches (cm)           | 10.45±0.22 a   | 10.20±0.30 a  | 9.80±0.25 b   | 8.40±0.13 d   | 9.06±0.18 c   | 10.13±0.24 ab | 8.82±0.19 cd  | 8.47±0.16 cd  |
| Number of secondary branches              | 30.11±1.61 a   | 25.25±2.39 a  | 17.71±2.59 c  | 19.88±1.82 bc | 22.00±1.81 bc | 24.40±2.80 ab | 19.44±1.05 bc | 24.66±1.91 ab |
| Weight per panicle (g)                    | 4.02±0.11 a    | 3.66±0.14 a   | 2.26±0.13 c   | 2.52±0.11 bc  | 2.88±0.15 b   | 2.56±0.26 bc  | 2.53±0.09 bc  | 2.73±0.16 b   |
| Number of grains per panicle              | 150.11±4.89 a  | 134.66±6 a    | 84.42±4.06 c  | 108.44±5.72 b | 111.88±8.27 b | 98.60±8.05 bc | 97.55±4.66 bc | 112.55±6.99 b |
| Number of vacant grains per panicle       | 13.44±2.16 cd  | 17.00±3.17 cd | 26.28±5.31 b  | 11.88±1.29 d  | 16.77±2.59bcd | 45.60±5.78 a  | 21.22±3.31bcd | 22.55±2.16 bc |
| Weight of grains per panicle (g)          | 3.76±0.10 a    | 3.23±0.09 a   | 2.11±0.15 c   | 2.44±0.13 bc  | 2.63±0.15 b   | 2.23±0.24 bc  | 2.30±0.08 bc  | 2.51±0.15 bc  |
| Tiller number                             | 17.66±1.66     | 17.00±1.15    | 18.66±2.33    | 16.00±0.57    | 20.66±1.66    | 18.00±2.00    | 18.00±2.51    | 17.00±2.08    |
| Thousand-grain weight (g)                 | 25.09±0.41     | 24.38±0.55    | 25.11±0.55    | 23.16±0.91    | 23.73±0.58    | 23.72±1.14    | 23.60±0.68    | 23.74±0.20    |
| Yield per plant (g)                       | 66.61±3.96 a   | 51.16±0.78 a  | 42.49±4.10 bc | 30.91±2.09 c  | 60.12±6.19 a  | 39.44±2.99 bc | 40.25±1.66 bc | 46.15±5.86 b  |
| Length of flag leaf (cm)                  | 58.00±2.64 a   | 54.33±1.20 a  | 41.66±0.88 b  | 36.33±0.66 c  | 40.33±0.88 bc | 40.66±0.33 bc | 44.56±2.43 b  | 41.33±0.33 b  |
| Width of flag leaf (cm)                   | 1.66±0.03 a    | 1.60±0.05 ab  | 1.50±0.00 bc  | 1.46±0.03 c   | 1.50±0.00 bc  | 1.53±0.03 bc  | 1.50±0.00 bc  | 1.43±0.06 b   |
| Leaf area of flag leaf (cm <sup>2</sup> ) | 80.69±5.16 a   | 73.95±3.23 a  | 52.08±1.10 bc | 44.44±1.80 c  | 50.41±1.10 bc | 51.97±1.39 bc | 55.70±3.04 b  | 49.33±1.91 bc |

\* Means with the same letter are not significantly different between the wild-type (cultivar Nipponbare), the vector control line, and the TaSPL3-OE transgenic lines ( $P < 0.05$ ). All data are presented as the mean ± standard error of the mean.

**Table S4.** Summary of the functions of *OsSPLs*, determined using transgenic (including overexpression and RNAi), mutant, or CRISPR/Cas9-mediated knockout approaches (provided as an EXCEL file).

## References

1. Hu, B.; Jin, J.; Guo, A. Y.; Zhang, H.; Luo, J.; Gao, G., GSDS 2.0: an upgraded gene feature visualization server. *Bioinformatics* **2015**, *31*, 1296-7.
2. Chen, C.; Chen, H.; He, Y.; Xia, R., TBtools, a toolkit for biologists integrating various biological data handling tools with a user-friendly interface. *BioRxiv* **2018**, 289660.
3. Dai, X.; Zhao, P. X., psRNATarget: a plant small RNA target analysis server. *Nucleic Acids Res* **2011**, *39*, W155-9.
4. Kozomara, A.; Griffiths-Jones, S., miRBase: integrating microRNA annotation and deep-sequencing data. *Nucleic Acids Res* **2011**, *39*, D152-7.
5. Tottman, D.; Makepeace, R.; Broad, H., An explanation of the decimal code for the growth stages of cereals, with illustrations. *Annals of Applied Biology* **1979**, *93*, 221-234.
6. Zadoks, J. C.; Chang, T. T.; Konzak, C. F., A decimal code for the growth stages of cereals. *Weed research* **1974**, *14*, 415-421.
